# Supplementary material for: Diatomite waste derived N-doped porous carbon for applications in the oxygen reduction reaction and supercapacitors
Source: Royal Society of Chemistry journal article supplement (doi:10.1039/d1na00057h), 2021-01-01
Supplement: d1na00057h1.pdf [file d1na00057h1.pdf]

## Supporting Information

### Diatomite waste derived N-doped porous carbon for oxygen reduction reaction and supercapacitor

Youguo Huang, Yiyan Wang, Yezheng Cai\*, Hongqiang Wang, Qingyu Li, Qiang Wu, Kui Liu, Zhaoling Ma\*

Guangxi Key Laboratory of Low Carbon Energy Materials, School of Chemistry and Pharmaceutical Sciences, Guangxi Normal University, Guilin, China.

\*Corresponding authors: 18810629627@163.com (Y. Cai), zhaolingma@163.com (Z. Ma)

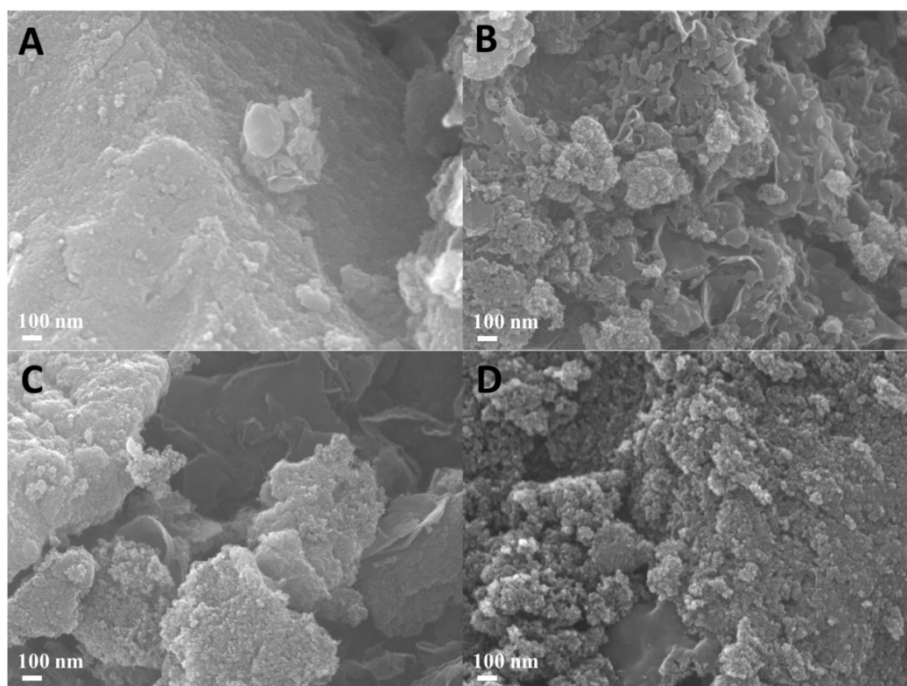

Fig. S1 SEM images of PC (A), NPC-1 (B), NPC-2 (C), and NPC-3 (D).

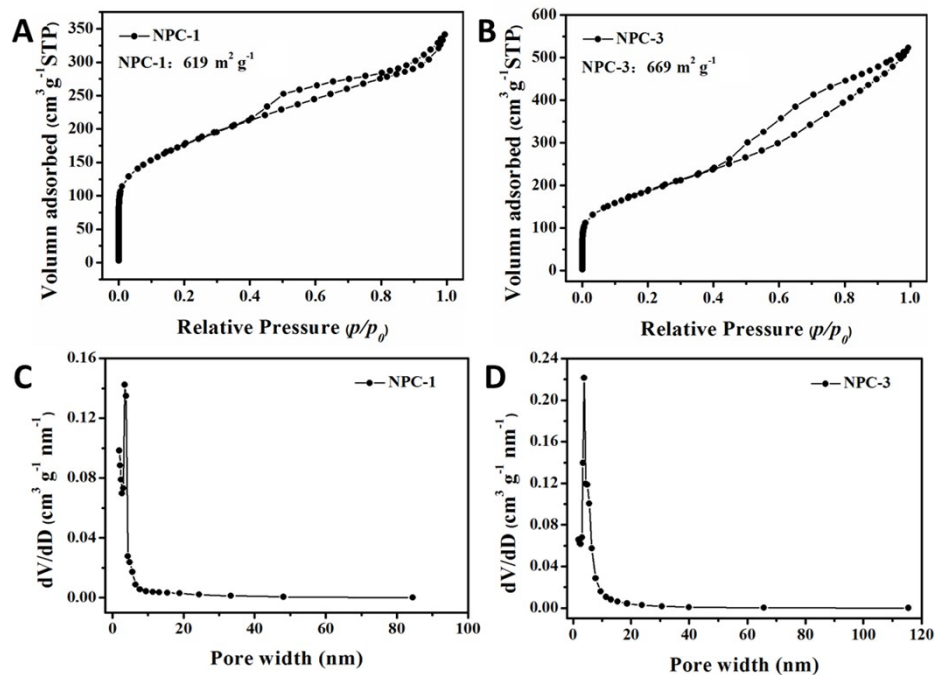

Fig. S2 The nitrogen adsorption-desorption isotherms (A, B) and pore size distribution curves (C, D) of NPC-1 and NPC-3 catalysts.

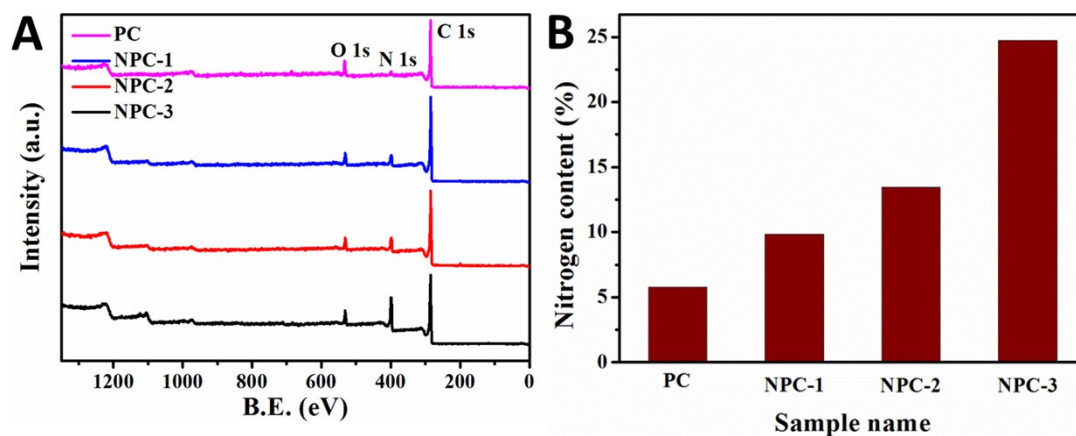

Fig. S3 XPS survey spectra (A), and their nitrogen content (B) of PC, NPC-1, NPC-2 and NPC-3.

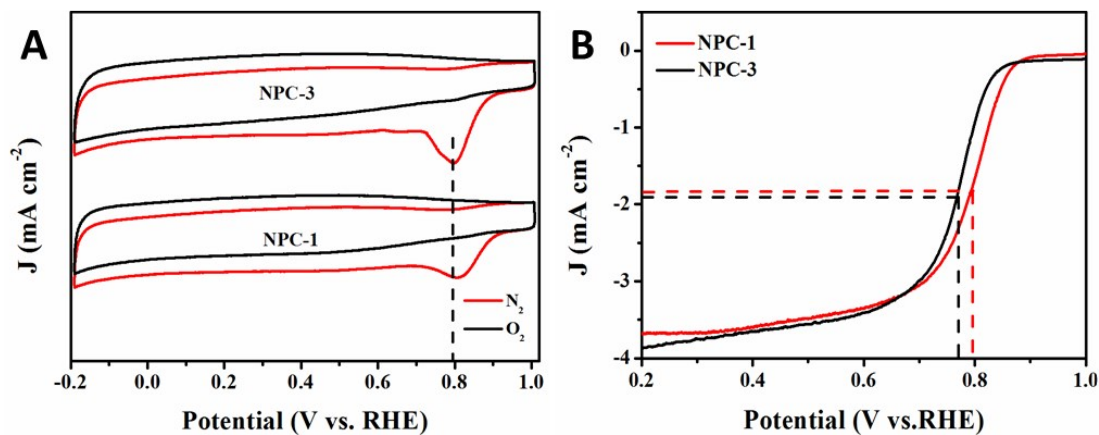

Fig. S4 CV curves (A) and LSV (B) curves of NPC-1 and NPC-3

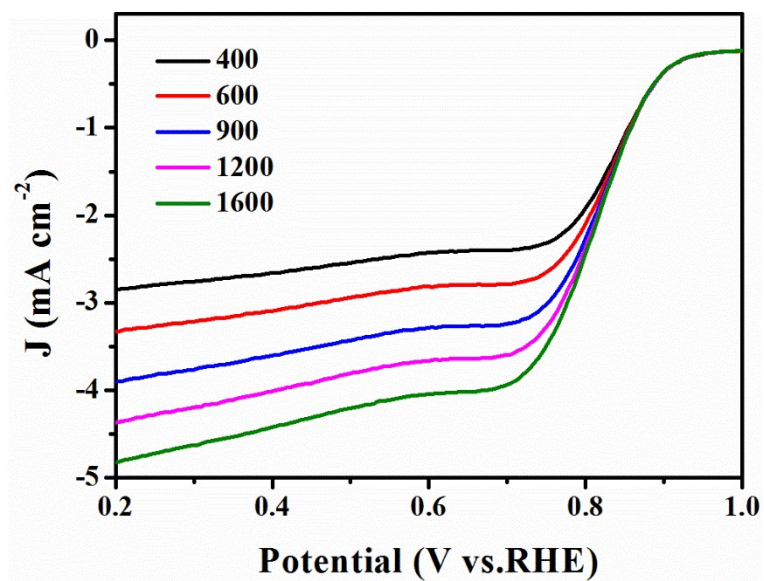

Fig. S5 LSV curves of NPC-2 recorded at different speed rates.

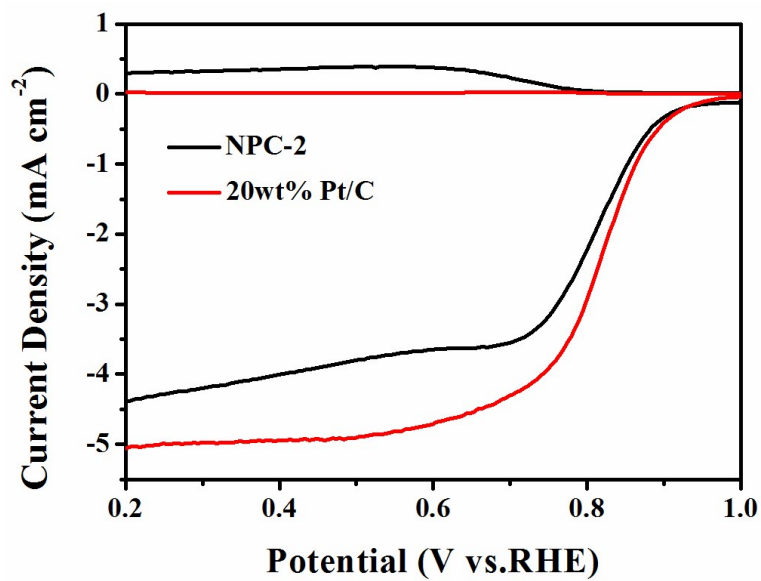

Fig. S6 RRDE curves of NPC-2 and 20 wt% Pt/C at a scan rate of 10 mV s<sup>-1</sup>.

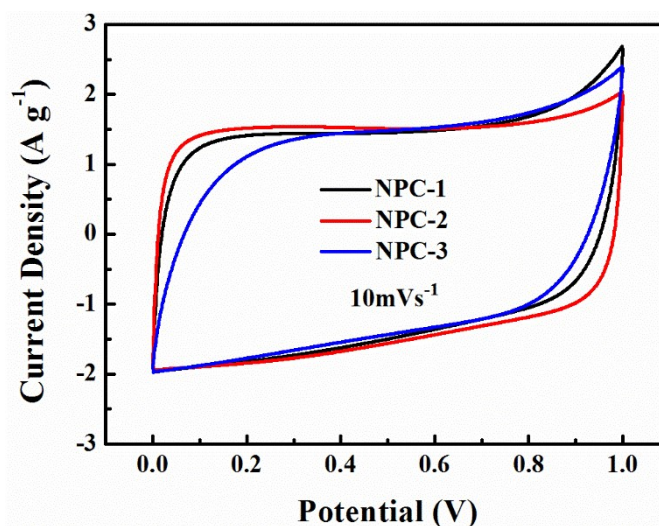

Fig. S7 CV curves of SCs based on NPC-1, NPC-2, and NPC-3.

Table S1 Surface compositions of NPC-1, NPC-2, and NPC-3.

| Samples | C % (atomic ratio) | N (atomic ratio) |
|---------|--------------------|------------------|
| NPC-1   | 90.17              | 9.83             |
| NPC-2   | 86.55              | 13.45            |
| NPC-3   | 75.27              | 24.73            |

Table S2 Summary of electrochemical parameters of biomass/biowaste-derived carbon as supercapacitor electrodes compared with NPC.

| Carbon Precursor                       | SSA (m <sup>2</sup> g <sup>-1</sup> ) | Electrolyte | Current density (A g <sup>-1</sup> ) | Specific capacitance (F g <sup>-1</sup> ) | Ref        |
|----------------------------------------|---------------------------------------|-------------|--------------------------------------|-------------------------------------------|------------|
| diatomite                              | 754                                   | 6 M KOH     | 1                                    | 151.5                                     | This study |
| Taro stems                             | 1012                                  | 6 M KOH     | 0.1                                  | 236.4                                     | 1          |
| Soybean                                | 1749                                  | 6 M KOH     | 0.5                                  | 243.2                                     | 2          |
| Mulberry leaves                        | 1689                                  | 6 M KOH     | 0.1                                  | 243.4                                     | 3          |
| Wheat flour                            | 995                                   | 6 M KOH     | 0.5                                  | 133.3                                     | 4          |
| Pomelo peel                            | 2091                                  | 6 M KOH     | 1                                    | 325                                       | 5          |
| wood                                   | 1438                                  | 6 M KOH     | 0.2                                  | 704                                       | 6          |
| Medulla tetrapanacis                   | 816                                   | 4 M KOH     | 1                                    | 251                                       | 7          |
| hydroxyapatite in pig bones            | 785.70                                | 6 M KOH     | 1                                    | 448.01                                    | 8          |
| corncoobs                              | 1182.7                                | 6 M KOH     | 0.5                                  | 247                                       | 9          |
| Tobacco Waste                          | 1875.5                                | 6 M KOH     | 1                                    | 49.1                                      | 10         |
| cotton stalks                          | 1634                                  | 6 M KOH     | 1                                    | 318                                       | 11         |
| Foxtail grass seeds                    | 819                                   | 6 M KOH     | 0.5                                  | 358.0                                     | 12         |
| beet pulp and industrial waste fly ash | 3221                                  | 6 M KOH     | 1                                    | 512.1                                     | 13         |

## References

- [1] D. He, W. Zhao, P. Li, Z. Liu, H. Wu, L. Liu, K. Han, L. Liu, Q. Wan, F.K. Butt, X. Qu, Bifunctional biomass-derived 3D nitrogen-doped porous carbon for oxygen reduction reaction and solid-state supercapacitor, *Appl. Surf. Sci.*, 465 (2019) 303-312.
- [2] G. Lin, R. Ma, Y. Zhou, Q. Liu, X. Dong, J. Wang, KOH activation of biomass-derived nitrogen-doped carbons for supercapacitor and electrocatalytic oxygen reduction, *Electrochimica Acta*, 261 (2018) 49-57.
- [3] D. He, W. Zhao, P. Li, S. Sun, Q. Tan, K. Han, L. Liu, L. Liu, X. Qu, Bifunctional biomass-derived N, S dual-doped ladder-like porous carbon for supercapacitor and oxygen reduction reaction, *J. Alloys Compd.*, 773 (2019) 11-20.
- [4] G. Lin, R. Ma, Y. Zhou, C. Hu, M. Yang, Q. Liu, S. Kaskel, J. Wang, Three-dimensional interconnected nitrogen-doped mesoporous carbons as active electrode materials for application in electrocatalytic oxygen reduction and supercapacitors, *J. Colloid Interface Sci.*, 527 (2018) 230-240.
- [5] M. Zhang, X. Jin, L. Wang, M. Sun, Y. Tang, Y. Chen, Y. Sun, X. Yang, P. Wan, Improving biomass-derived carbon by activation with nitrogen and cobalt for supercapacitors and oxygen reduction reaction, *Appl. Surf. Sci.*, 411 (2017) 251-260.
- [6] Z. Tang, Z. Pei, Z. Wang, H. Li, J. Zeng, Z. Ruan, Y. Huang, M. Zhu, Q. Xue, J. Yu, C. Zhi, Highly anisotropic, multichannel wood carbon with optimized heteroatom doping for supercapacitor and oxygen reduction reaction, *Carbon*, 130 (2018) 532-543.
- [7] B. Liu, M. Yang, D. Yang, H. Chen, H. Li, Medulla tetrapanacis-derived O/N co-doped porous carbon materials for efficient oxygen reduction electrocatalysts and high-rate supercapacitors, *Electrochimica Acta*, 272 (2018) 88-96.
- [8] Y. Yao, Q. Feng, B. Huo, H. Zhou, Z. Huang, H. Li, Z. Yan, X. Yang and Y. Kuang, *Chem. Commun.*, 2020, **56**, 11689-11692.
- [9] M. Xu, Q. Huang, J. Lu and J. Niu, *Industrial Crops and Products*, 2021, 161, 113215-113223.
- [10] Z. Huang, C. Qin, J. Wang, L. Cao, Z. Ma, Q. Yuan, Z. Lin and P. Zhang, *Materials* 2021, **14**, 1714-1726.
- [11] R. Guo, N. Guo, W. Luo, M. Xu, D. Zhou, R. Ma, R. Sheng, J. Guo, D. Jia and L. Wang, *Int J Energy Res.*, 2021, 1-11.
- [12] X. Liang, R. Liu and X. Wu, *Micropor. . Mesopor. Mat.*, 2021, **310**, 110659-110666.
- [13] G. Zheng, Z. Huang and Z. Liu, *J. Power Sources*, 2021, 482, 228935-228947.
